# Supplementary material
Source: PubMed Central journal article supplement (PMC5924689)
Supplement: NIHMS957962-supplement-supplement_1.pdf [file NIHMS957962-supplement-supplement_1.pdf]

**SUPPLEMENTAL TABLE.** Matched Characteristics of Propensity Score Matched Patients Undergoing Resection of Hilar Cholangiocarcinoma with and without Adjuvant Therapy

| Characteristic   | No. (Column %) or Mean (SD)          |                                   | P-value |
|------------------|--------------------------------------|-----------------------------------|---------|
|                  | <u>No Adjuvant Therapy</u><br>(n=72) | <u>Adjuvant Therapy</u><br>(n=72) |         |
| Age, yrs         | 64.9 (10.1)                          | 65.7 (11.0)                       | 0.640   |
| ASA $\geq$ 3     | 34 (47.2%)                           | 33 (45.8%)                        | 0.867   |
| LN positive      | 25 (34.7%)                           | 26 (36.1%)                        | 0.862   |
| <b>Grade</b>     |                                      |                                   |         |
| Well             | 16 (22.2%)                           | 16 (22.2%)                        | 0.400   |
| Moderate         | 42 (58.3%)                           | 36 (50.0%)                        |         |
| Poor             | 13 (18.1%)                           | 27.8%)                            |         |
| Undifferentiated | 1 (1.4%)                             | 0                                 |         |
